# Supplementary material for: Canonical Insertion-Deletion Markers for Rapid DNA Typing of Francisella tularensis
Source: PubMed Central journal article supplement (PMC2874433; doi:10.3201/eid1311.070603), 2007-11
Supplement: 07-0603_appT2-s2.pdf [file 07-0603_appT2-s2.pdf]

Appendix Table 2. *Francisella tularensis* strains and PCR-amplicon sizes at 38 indel loci\*

| Species (genetic clade), source                              | FSC no. | Other designation | Amplified DNA size (bp) at indel locus* |        |        |        |        |        |        |        |        |         |
|--------------------------------------------------------------|---------|-------------------|-----------------------------------------|--------|--------|--------|--------|--------|--------|--------|--------|---------|
|                                                              |         |                   | Ftind1                                  | Ftind2 | Ftind3 | Ftind4 | Ftind5 | Ftind6 | Ftind7 | Ftind8 | Ftind9 | Ftind10 |
| <i>F. tularensis</i> subsp. <i>novicida</i>                  |         |                   |                                         |        |        |        |        |        |        |        |        |         |
| Water, 1950, Utah                                            | 040     | U112, ATCC 15482  | 316                                     | 288    | 387    | 228    | 202    | 394    | 382    | 380    | 388    | 286     |
| Human, 2004, UK-Germany-Brazil                               | 595     | F58               | 292                                     | 355    | 388    | 230    | 205    | 394    | 382    | 380    | 389    | 285     |
| <i>F. tularensis</i> subsp. <i>tularensis</i> (A.II)         |         |                   |                                         |        |        |        |        |        |        |        |        |         |
| Rabbit, 1953, Nevada                                         | 054     | Nevada 14         | 293                                     | 354    | 376    | 236    | 216    | 350    | 372    | 375    | 389    | 285     |
| Human lymph node, 1920, Utah                                 | 230     | ATCC6223          | 292                                     | 354    | 376    | 237    | 216    | 351    | 372    | 375    | 388    | 285     |
| Foal, 1959, Montana                                          | 604     | 8859              | 293                                     | 355    | 377    | 237    | 216    | 350    | 372    | 375    | 388    | 284     |
| <i>F. tularensis</i> subsp. <i>tularensis</i> (A.I)          |         |                   |                                         |        |        |        |        |        |        |        |        |         |
| Human ulcer, 1941, Ohio                                      | 237     | SCHU S4           | 292                                     | 354    | 376    | 236    | 215    | 351    | 373    | 374    | 270    | 281     |
| Tick, 1935, British Columbia, Canada                         | 041     | Vavenby           | 293                                     | 354    | 377    | 236    | 216    | 350    | 372    | 374    | 269    | 281     |
| Human pleural fluid, 1940, Ohio                              | 046     | Fox Downs         | 292                                     | 354    | 376    | 237    | 217    | 350    | 372    | 375    | 270    | 280     |
| <i>F. tularensis</i> subsp. <i>mediasiatica</i>              |         |                   |                                         |        |        |        |        |        |        |        |        |         |
| Miday gerbil, 1965, Kazakhstan                               | 147     | GIEM 543          | 292                                     | 354    | 376    | 237    | 216    | 346    | 372    | 374    | 388    | 285     |
| Tick, 1982, Central Asia                                     | 148     | 240               | 292                                     | 354    | 376    | 236    | 216    | 346    | 372    | 374    | 388    | 286     |
| Hare, 1965, Central Asia                                     | 149     | 120               | 291                                     | 354    | 376    | 237    | 216    | 346    | 372    | 374    | 389    | 285     |
| <i>F. tularensis</i> subsp. <i>holarctica</i> (Japanese)     |         |                   |                                         |        |        |        |        |        |        |        |        |         |
| Human lymph node, 1926, Japan                                | 017     | S-2               | 292                                     | 354    | 374    | 237    | 216    | 350    | 372    | 374    | 388    | 285     |
| Human, 1958, Japan                                           | 021     | Tsuchiya          | 293                                     | 354    | 374    | 236    | 216    | 350    | 372    | 374    | 388    | 286     |
| Human, 1950, Japan                                           | 022     | Ebina             | 292                                     | 354    | 374    | 236    | 216    | 351    | 372    | 374    | 388    | 285     |
| <i>F. tularensis</i> subsp. <i>holarctica</i> (non-Japanese) |         |                   |                                         |        |        |        |        |        |        |        |        |         |
| Beaver, 1976, Hamilton, Montana                              | 035     | B423A             | 293                                     | 354    | 377    | 236    | 215    | 351    | 373    | 374    | 388    | 286     |
| Tick, 1941, Montana                                          | 012     | 425F4G            | 293                                     | 354    | 375    | 237    | 216    | 351    | 372    | 374    | 388    | 286     |
| Human, 2004, Örebro, Sweden                                  | 519     |                   | 293                                     | 355    | 377    | 236    | 216    | 350    | 372    | 373    | 388    | 285     |
| Live vaccine strain, Russia                                  | 458     | LVS, ATCC 29684   | 292                                     | 354    | 376    | 236    | 215    | 351    | 373    | 374    | 388    | 285     |

|                                 |     |              |     |     |     |     |     |     |     |     |     |     |
|---------------------------------|-----|--------------|-----|-----|-----|-----|-----|-----|-----|-----|-----|-----|
| Human, 1995, Ljusdal, Sweden    | 171 |              | 292 | 354 | 376 | 237 | 216 | 350 | 372 | 374 | 388 | 285 |
| Human, 2003, Örebro, Sweden     | 398 |              | 292 | 354 | 376 | 237 | 216 | 350 | 372 | 373 | 388 | 285 |
| Human, 2003, Örebro, Sweden     | 412 |              | 292 | 354 | 376 | 236 | 216 | 351 | 372 | 373 | 388 | 285 |
| Human, 2003, Örebro, Sweden     | 429 |              | 293 | 355 | 377 | 236 | 216 | 350 | 372 | 373 | 388 | 285 |
| Tick, 1949, Moscow area, Russia | 257 | GIEM 503/840 | 293 | 355 | 377 | 237 | 216 | 350 | 372 | 373 | 388 | 285 |

## Amplified DNA size (bp) at indel locus\*

| Species (genetic clade), source                               | FSC no. | Other designation | Ftind11 | Ftind12 | Ftind13 | Ftind14 | Ftind15 | Ftind16 | Ftind17 | Ftind18 | Ftind19 | Ftind20 |
|---------------------------------------------------------------|---------|-------------------|---------|---------|---------|---------|---------|---------|---------|---------|---------|---------|
| <i>F. tularensis</i> subsp. <i>novicida</i>                   |         |                   |         |         |         |         |         |         |         |         |         |         |
| Water, 1950, Utah                                             | 040     | U112, ATCC 15482  | 317     | 288     | 274     | 268     | 249     | 268     | 212     | 225     | 171     | 337     |
| Human, 2004, UK-Germany-Brazil                                | 595     | F58               | 317     | 287     | 279     | 268     | 249     | 268     | 212     | 225     | 171     | 336     |
| <i>Francisella tularensis</i> subsp. <i>tularensis</i> (A.II) |         |                   |         |         |         |         |         |         |         |         |         |         |
| Rabbit, 1953, Nevada                                          | 054     | Nevada 14         | 317     | 273     | 264     | 256     | 249     | 268     | 212     | 225     | 171     | 336     |
| Human lymph node, 1920, Utah                                  | 230     | ATCC6223          | 317     | 273     | 263     | 256     | 249     | 268     | 212     | 225     | 171     | 336     |
| Foal, 1959, Montana                                           | 604     | 8859              | 317     | 272     | 264     | 256     | 249     | 268     | 212     | 225     | 171     | 337     |
| <i>F. tularensis</i> subsp. <i>tularensis</i> (A.I)           |         |                   |         |         |         |         |         |         |         |         |         |         |
| Human ulcer, 1941, Ohio                                       | 237     | SCHU S4           | 279     | 272     | 262     | 256     | 249     | 268     | 212     | 225     | 171     | 337     |
| Tick, 1935, British Columbia, Canada                          | 041     | Vavenby           | 279     | 272     | 263     | 256     | 249     | 268     | 212     | 225     | 171     | 337     |
| Human pleural fluid, 1940, Ohio                               | 046     | Fox Downs         | 279     | 272     | 262     | 256     | 249     | 268     | 212     | 225     | 171     | 337     |
| <i>F. tularensis</i> subsp. <i>mediasiatica</i>               |         |                   |         |         |         |         |         |         |         |         |         |         |
| Miday gerbil, 1965, Kazakhstan                                | 147     | GIEM 543          | 317     | 289     | 262     | 256     | 234     | 243     | 192     | 203     | 145     | 337     |
| Tick, 1982, Central Asia                                      | 148     | 240               | 317     | 268     | 263     | 256     | 234     | 243     | 192     | 203     | 145     | 336     |
| Hare, 1965, Central Asia                                      | 149     | 120               | 317     | 289     | 262     | 256     | 234     | 243     | 192     | 203     | 145     | 336     |
| <i>F. tularensis</i> subsp. <i>holarctica</i> (Japanese)      |         |                   |         |         |         |         |         |         |         |         |         |         |
| Human lymphnode, 1926, Japan                                  | 017     | S-2               | 317     | 288     | 274     | 267     | 250     | 268     | 212     | 225     | 171     | 323     |
| Human, 1958, Japan                                            | 021     | Tsuchiya          | 318     | 288     | 275     | 267     | 250     | 268     | 212     | 225     | 171     | 323     |
| Human, 1950, Japan                                            | 022     | Ebina             | 317     | 288     | 274     | 267     | 250     | 268     | 212     | 225     | 171     | 323     |

*F. tularensis* subsp. *holarctica* (non-Japanese)

|                                 |     |                 |     |     |     |     |     |     |     |     |     |     |
|---------------------------------|-----|-----------------|-----|-----|-----|-----|-----|-----|-----|-----|-----|-----|
| Beaver, 1976, Hamilton, Montana | 035 | B423A           | 317 | 288 | 274 | 267 | 249 | 268 | 212 | 225 | 171 | 324 |
| Tick, 1941, Montana             | 012 | 425F4G          | 318 | 288 | 274 | 267 | 249 | 268 | 212 | 225 | 171 | 323 |
| Human, 2004, Örebro, Sweden     | 519 |                 | 317 | 288 | 273 | 267 | 249 | 268 | 212 | 225 | 171 | 323 |
| Live vaccine strain, Russia     | 458 | LVS, ATCC 29684 | 317 | 289 | 273 | 268 | 249 | 268 | 212 | 225 | 171 | 324 |
| Human, 1995, Ljusdal, Sweden    | 171 |                 | 317 | 288 | 273 | 267 | 249 | 268 | 212 | 225 | 171 | 324 |
| Human, 2003, Örebro, Sweden     | 398 |                 | 317 | 287 | 273 | 267 | 249 | 268 | 212 | 225 | 171 | 324 |
| Human, 2003, Örebro, Sweden     | 412 |                 | 317 | 288 | 274 | 267 | 249 | 268 | 212 | 225 | 171 | 323 |
| Human, 2003, Örebro, Sweden     | 429 |                 | 317 | 288 | 273 | 267 | 249 | 268 | 212 | 225 | 171 | 323 |
| Tick, 1949, Moscow area, Russia | 257 | GIEM 503/840    | 317 | 288 | 273 | 267 | 249 | 268 | 212 | 225 | 171 | 324 |

## Amplified DNA size (bp) at indel locus\*

| Species (genetic clade), source                        | FSC no. | Other designation | Amplified DNA size (bp) at indel locus* |         |         |         |         |         |         |         |         |         |
|--------------------------------------------------------|---------|-------------------|-----------------------------------------|---------|---------|---------|---------|---------|---------|---------|---------|---------|
|                                                        |         |                   | Ftind21                                 | Ftind22 | Ftind23 | Ftind24 | Ftind25 | Ftind26 | Ftind27 | Ftind28 | Ftind29 | Ftind30 |
| <i>F. tularensis</i> subsp. <i>novicida</i>            |         |                   |                                         |         |         |         |         |         |         |         |         |         |
| Water, 1950, Utah                                      | 040     | U112, ATCC 15482  | 352                                     | 345     | 241     | 341     | 348     | 347     | 339     | 337     | 338     | 352     |
| Human, 2004, UK-Germany-Brazil                         | 595     | F58               | 352                                     | 347     | 241     | 341     | 349     | 346     | 339     | 337     | 337     | 351     |
| <i>F. tularensis</i> subsp. <i>tularensis</i> , (A.II) |         |                   |                                         |         |         |         |         |         |         |         |         |         |
| Rabbit, 1953, Nevada                                   | 054     | Nevada 14         | 353                                     | 345     | 241     | 341     | 349     | 347     | 341     | 337     | 337     | 351     |
| Human lymph node, 1920, Utah                           | 230     | ATCC6223          | 353                                     | 345     | 242     | 341     | 349     | 347     | 341     | 337     | 338     | 351     |
| Foal, 1959, Montana                                    | 604     | 8859              | 353                                     | 346     | 241     | 341     | 349     | 346     | 341     | 337     | 338     | 351     |
| <i>F. tularensis</i> subsp. <i>tularensis</i> , (A.I)  |         |                   |                                         |         |         |         |         |         |         |         |         |         |
| Human ulcer, 1941, Ohio                                | 237     | SCHU S4           | 352                                     | 346     | 242     | 341     | 348     | 347     | 340     | 337     | 338     | 352     |
| Tick, 1935, British Columbia, Canada                   | 041     | Vavenby           | 352                                     | 345     | 241     | 341     | 348     | 347     | 340     | 336     | 338     | 351     |
| Human pleural fluid, 1940, Ohio                        | 046     | Fox Downs         | 353                                     | 345     | 242     | 341     | 349     | 348     | 341     | 337     | 338     | 352     |
| <i>F. tularensis</i> subsp. <i>mediasiatica</i>        |         |                   |                                         |         |         |         |         |         |         |         |         |         |
| Miday gerbil, 1965, Kazakhstan                         | 147     | GIEM 543          | 353                                     | 346     | 242     | 341     | 349     | 347     | 340     | 337     | 337     | 351     |
| Tick, 1982, Central Asia                               | 148     | 240               | 352                                     | 346     | 241     | 340     | 349     | 347     | 340     | 337     | 337     | 351     |

|                          |     |     |     |     |     |     |     |     |     |     |     |     |
|--------------------------|-----|-----|-----|-----|-----|-----|-----|-----|-----|-----|-----|-----|
| Hare, 1965, Central Asia | 149 | 120 | 352 | 346 | 241 | 340 | 349 | 347 | 340 | 337 | 337 | 351 |
|--------------------------|-----|-----|-----|-----|-----|-----|-----|-----|-----|-----|-----|-----|

*F. tularensis* subsp. *holarctica* (Japanese)

|                               |     |          |     |     |     |     |     |     |     |     |     |     |
|-------------------------------|-----|----------|-----|-----|-----|-----|-----|-----|-----|-----|-----|-----|
| Human lymph node, 1926, Japan | 017 | S-2      | 342 | 312 | 228 | 336 | 349 | 347 | 340 | 337 | 338 | 351 |
| Human, 1958, Japan            | 021 | Tsuchiya | 343 | 312 | 228 | 336 | 349 | 347 | 340 | 337 | 339 | 351 |
| Human, 1950, Japan            | 022 | Ebina    | 343 | 312 | 228 | 336 | 349 | 347 | 340 | 337 | 338 | 351 |

*F. tularensis* subsp. *holarctica* (non-Japanese)

|                                 |     |                 |     |     |     |     |     |     |     |     |     |     |
|---------------------------------|-----|-----------------|-----|-----|-----|-----|-----|-----|-----|-----|-----|-----|
| Beaver, 1976, Hamilton, Montana | 035 | B423A           | 342 | 312 | 230 | 336 | 345 | 284 | 315 | 310 | 331 | 352 |
| Tick, 1941, Montana             | 012 | 425F4G          | 343 | 312 | 228 | 336 | 344 | 284 | 315 | 311 | 330 | 351 |
| Human, 2004, Örebro, Sweden     | 519 |                 | 343 | 312 | 228 | 336 | 343 | 284 | 315 | 310 | 330 | 351 |
| Live vaccine strain, Russia     | 458 | LVS, ATCC 29684 | 343 | 312 | 229 | 336 | 344 | 284 | 315 | 311 | 331 | 346 |
| Human, 1995, Ljusdal, Sweden    | 171 |                 | 343 | 313 | 228 | 336 | 344 | 284 | 315 | 310 | 331 | 346 |
| Human, 2003, Örebro, Sweden     | 398 |                 | 342 | 313 | 228 | 336 | 343 | 284 | 315 | 311 | 330 | 346 |
| Human, 2003, Örebro, Sweden     | 412 |                 | 343 | 312 | 228 | 336 | 344 | 284 | 315 | 310 | 330 | 346 |
| Human, 2003, Örebro, Sweden     | 429 |                 | 342 | 312 | 228 | 336 | 344 | 284 | 315 | 310 | 330 | 346 |
| Tick, 1949, Moscow area, Russia | 257 | GIEM 503/840    | 342 | 312 | 228 | 336 | 343 | 284 | 315 | 311 | 330 | 346 |

## Amplified DNA size (bp) at indel locus\*

| Species (genetic clade), source                      | FSC no. | Other designation | Ftind31 | Ftind32 | Ftind33 | Ftind34 | Ftind35 | Ftind36 | Ftind37 |
|------------------------------------------------------|---------|-------------------|---------|---------|---------|---------|---------|---------|---------|
| <i>F. tularensis</i> subsp. <i>novicida</i>          |         |                   |         |         |         |         |         |         |         |
| Water, 1950, Utah                                    | 040     | U112, ATCC 15482  | 328     | 334     | 315     | 308     | 388     | 244     | 398     |
| Human, 2004, UK-Germany-Brazil                       | 595     | F58               | 327     | 335     | 315     | 308     | 386     | 244     | 397     |
| <i>F. tularensis</i> subsp. <i>tularensis</i> (A.II) |         |                   |         |         |         |         |         |         |         |
| Rabbit, 1953, Nevada                                 | 054     | Nevada 14         | 325     | 334     | 315     | 308     | 387     | 244     | 399     |
| Human lymph node, 1920, Utah                         | 230     | ATCC6223          | 325     | 324 334 | 315     | 308     | 388     | 244     | 398     |
| Foal, 1959, Montana                                  | 604     | 8859              | 325     | 335     | 314     | 308     | 387     | 244     | 398     |
| <i>F. tularensis</i> subsp. <i>tularensis</i> (A.I)  |         |                   |         |         |         |         |         |         |         |
| Human ulcer, 1941, Ohio                              | 237     | SCHU S4           | 325     | 335     | 314     | 305     | 388     | 244     | 399     |

|                                                              |     |                 |     |     |     |     |     |     |     |
|--------------------------------------------------------------|-----|-----------------|-----|-----|-----|-----|-----|-----|-----|
| Tick, 1935, British Columbia, Canada                         | 041 | Vavenby         | 325 | 334 | 315 | 308 | 387 | 244 | 397 |
| Human pleural fluid, 1940, Ohio                              | 046 | Fox Downs       | 325 | 335 | 315 | 308 | 387 | 244 | 399 |
| <i>F. tularensis</i> subsp. <i>mediasiatica</i>              |     |                 |     |     |     |     |     |     |     |
| Miday gerbil, 1965, Kazakhstan                               | 147 | GIEM 543        | 324 | 334 | 315 | 308 | 388 | 243 | 398 |
| Tick, 1982, Central Asia                                     | 148 | 240             | 325 | 334 | 315 | 308 | 387 | 244 | 399 |
| Hare, 1965, Central Asia                                     | 149 | 120             | 325 | 334 | 315 | 308 | 387 | 244 | 398 |
| <i>F. tularensis</i> subsp. <i>holarctica</i> (Japanese)     |     |                 |     |     |     |     |     |     |     |
| Human lymph node, 1926, Japan                                | 017 | S-2             | 325 | 334 | 315 | 308 | 387 | 244 | 398 |
| Human, 1958, Japan                                           | 021 | Tsuchiya        | 325 | 334 | 315 | 308 | 388 | 245 | 399 |
| Human, 1950, Japan                                           | 022 | Ebina           | 325 | 334 | 315 | 308 | 387 | 244 | 398 |
| <i>F. tularensis</i> subsp. <i>holarctica</i> (non-Japanese) |     |                 |     |     |     |     |     |     |     |
| Beaver, 1976, Hamilton, Montana                              | 035 | B423A           | 326 | 334 | 315 | 308 | 371 | 236 | 391 |
| Tick, 1941, Montana                                          | 012 | 425F4G          | 325 | 334 | 315 | 308 | 388 | 244 | 398 |
| Human, 2004, Örebro, Sweden                                  | 519 |                 | 325 | 334 | 315 | 308 | 387 | 244 | 397 |
| Live vaccine strain, Russia                                  | 458 | LVS, ATCC 29684 | 321 | 324 | 296 | 268 | 388 | 244 | 398 |
| Human, 1995, Ljusdal, Sweden                                 | 171 |                 | 320 | 324 | 295 | 268 | 387 | 244 | 398 |
| Human, 2003, Örebro, Sweden                                  | 398 |                 | 319 | 325 | 295 | 268 | 387 | 244 | 399 |
| Human, 2003, Örebro, Sweden                                  | 412 |                 | 320 | 324 | 295 | 268 | 387 | 244 | 399 |
| Human, 2003, Örebro, Sweden                                  | 429 |                 | 320 | 324 | 294 | 266 | 387 | 244 | 397 |
| Tick, 1949, Moscow area, Russia                              | 257 | GIEM 503/840    | 319 | 324 | 295 | 266 | 387 | 243 | 399 |

\*Size determinations include a 19-bp M-13 primer tail sequence used for fluorescent labeling. Ftindel, *F. tularensis* insertion-deletion loci; FSC, *Francisella* Strain Collection; ATCC, American Type Culture Collection.
