# Supplementary material for: Canonical Insertion-Deletion Markers for Rapid DNA Typing of Francisella tularensis
Source: PubMed Central journal article supplement (PMC2874433; doi:10.3201/eid1311.070603), 2007-11
Supplement: 07-0603_appT3-s3.pdf [file 07-0603_appT3-s3.pdf]

Appendix Table 3. *Francisella tularensis* strains and repeat copy number at 25 MLVA loci\*

| Species (genetic clade),<br>source                       | FSC<br>no. | Other<br>designation | Repeat copy no. at MLVA locus |           |           |           |           |           |           |           |           |            |            |            |            |            |            |            |            |            |            |            |            |            |            |            |            |
|----------------------------------------------------------|------------|----------------------|-------------------------------|-----------|-----------|-----------|-----------|-----------|-----------|-----------|-----------|------------|------------|------------|------------|------------|------------|------------|------------|------------|------------|------------|------------|------------|------------|------------|------------|
|                                                          |            |                      | Ft-<br>M1                     | Ft-<br>M2 | Ft-<br>M3 | Ft-<br>M4 | Ft-<br>M5 | Ft-<br>M6 | Ft-<br>M7 | Ft-<br>M8 | Ft-<br>M9 | Ft-<br>M10 | Ft-<br>M11 | Ft-<br>M12 | Ft-<br>M13 | Ft-<br>M14 | Ft-<br>M15 | Ft-<br>M16 | Ft-<br>M17 | Ft-<br>M18 | Ft-<br>M19 | Ft-<br>M20 | Ft-<br>M21 | Ft-<br>M22 | Ft-<br>M23 | Ft-<br>M24 | Ft-<br>M25 |
| <i>F. tularensis</i> subsp. <i>novicida</i>              |            |                      |                               |           |           |           |           |           |           |           |           |            |            |            |            |            |            |            |            |            |            |            |            |            |            |            |            |
| Water, 1950, Utah                                        | 040        | U112, ATCC<br>15482  | 3                             | 2         | 32        | 5         | 2         | 4         | 2         | 2         | 4         | 2          | 4          | 2          | 2          | 3          | 3          | 1          | 2          | 2          | 1          | 31         | 2          | 4          | 1          | 1          | 5          |
| Human, 2004, UK-<br>Germany-Brazil                       | 595        | F58                  | 3                             | 2         | 20        | 5         | 2         | 4         | 2         | 1         | 2         | 2          | 4          | 2          | 2          | 4          | 3          | 1          | 2          | 2          | 1          | 31         | 2          | 4          | 1          | 1          | 5          |
| <i>F. tularensis</i> subsp. <i>tularensis</i> (A.II)     |            |                      |                               |           |           |           |           |           |           |           |           |            |            |            |            |            |            |            |            |            |            |            |            |            |            |            |            |
| Rabbit, 1953, Nevada                                     | 054        | Nevada 14            | 3                             | 21        | 16        | 3         | 2         | 4         | 2         | 2         | 2         | 1          | 5          | 2          | 1          | 3          | 3          | 1          | 2          | 2          | 1          | 22         | 2          | 3          | 1          | 1          | 5          |
| Human lymph node,<br>1920, Utah                          | 230        | ATCC6223             | 3                             | 25        | 8         | 3         | 2         | 4         | 2         | 4         | 2         | 1          | 5          | 2          | 1          | 3          | 3          | 1          | 2          | 2          | 1          | 25         | 2          | 3          | 1          | 1          | 5          |
| Foal, 1959, Montana                                      | 604        | 8859                 | 3                             | 7         | 11        | 4         | 2         | 4         | 2         | 2         | 2         | 1          | 5          | 2          | 1          | 4          | 3          | 1          | 2          | 2          | 1          | 21         | 3          | 3          | 1          | 1          | 5          |
| <i>F. tularensis</i> subsp. <i>tularensis</i> , (A.I)    |            |                      |                               |           |           |           |           |           |           |           |           |            |            |            |            |            |            |            |            |            |            |            |            |            |            |            |            |
| Human ulcer, 1941,<br>Ohio                               | 237        | SCHU S4              | 3                             | 4         | 25        | 3         | 3         | 4         | 4         | 4         | 4         | 20         | 5          | 2          | 2          | 3          | 2          | 2          | 3          | 4          | 1          | 3          | 3          | 2          | 2          | 1          | 5          |
| Tick, 1935, British<br>Columbia, Canada                  | 041        | Vavenby              | 3                             | 24        | 19        | 3         | 2         | 4         | 3         | 2         | 5         | 10         | 5          | 2          | 2          | 3          | 2          | 2          | 3          | 4          | 1          | 3          | 2          | 2          | 1          | 1          | 5          |
| Human pleural fluid,<br>1940, Ohio                       | 046        | Fox Downs            | 3                             | 4         | 27        | 3         | 5         | 5         | 3         | 3         | 5         | 9          | 5          | 2          | 2          | 3          | 2          | 2          | 3          | 4          | 1          | 3          | 3          | 2          | 2          | 1          | 5          |
| <i>F. tularensis</i> subsp. <i>mediasiatica</i>          |            |                      |                               |           |           |           |           |           |           |           |           |            |            |            |            |            |            |            |            |            |            |            |            |            |            |            |            |
| Miday gerbil, 1965,<br>Kazakhstan                        | 147        | GIEM 543             | 4                             | 2         | 28        | 3         | 6         | 2         | 2         | 1         | 3         | 2          | 3          | 1          | 1          | 2          | 3          | 1          | 2          | 2          | 1          | 7          | 2          | 7          | 1          | 1          | 5          |
| Tick, 1982, Central Asia                                 | 148        | 240                  | 4                             | 2         | 25        | 3         | 10        | 3         | 2         | 1         | 3         | 2          | 3          | 1          | 1          | 2          | 3          | 1          | 2          | 2          | 1          | 6          | 2          | 14         | 1          | 1          | 5          |
| Hare, 1965, Central<br>Asia                              | 149        | 120                  | 4                             | 2         | 27        | 3         | 6         | 2         | 2         | 1         | 3         | 2          | 3          | 1          | 1          | 2          | 3          | 1          | 2          | 2          | 1          | 7          | 2          | 7          | 1          | 1          | 5          |
| <i>F. tularensis</i> subsp. <i>holarctica</i> (Japanese) |            |                      |                               |           |           |           |           |           |           |           |           |            |            |            |            |            |            |            |            |            |            |            |            |            |            |            |            |
| Human lymph node,<br>1926, Japan                         | 017        | S-2                  | 3                             | 24        | 3         | 5         | 2         | 4         | 2         | 3         | 2         | 4          | 5          | 2          | 1          | 3          | 2          | 1          | 2          | 2          | 0          | 18         | 3          | 3          | 1          | 1          | 5          |
| Human, 1958, Japan                                       | 021        | Tsuchiya             | 3                             | 8         | 3         | 5         | 2         | 5         | 2         | 1         | 2         | 8          | 5          | 2          | 1          | 3          | 3          | 1          | 2          | 2          | 0          | 11         | 2          | 3          | 1          | 1          | 5          |

|                                                              |     |                 |   |    |    |   |   |   |   |   |   |   |   |   |   |   |   |   |   |   |   |    |   |   |   |   |   |
|--------------------------------------------------------------|-----|-----------------|---|----|----|---|---|---|---|---|---|---|---|---|---|---|---|---|---|---|---|----|---|---|---|---|---|
| Human, 1950, Japan                                           | 022 | Ebina           | 3 | 12 | 3  | 5 | 2 | 4 | 1 | 4 | 2 | 4 | 5 | 2 | 1 | 3 | 3 | 1 | 2 | 2 | 0 | 11 | 2 | 3 | 1 | 1 | 5 |
| <i>F. tularensis</i> subsp. <i>holarctica</i> (non-Japanese) |     |                 |   |    |    |   |   |   |   |   |   |   |   |   |   |   |   |   |   |   |   |    |   |   |   |   |   |
| Beaver, 1976, Hamilton, Montana                              | 035 | B423A           | 3 | 2  | 19 | 6 | 2 | 5 | 2 | 2 | 2 | 2 | 5 | 2 | 1 | 3 | 3 | 1 | 2 | 2 | 0 | 3  | 2 | 3 | 1 | 2 | 4 |
| Tick, 1941, Montana                                          | 012 | 425F4G          | 3 | 2  | 18 | 5 | 2 | 7 | 2 | 2 | 2 | 2 | 5 | 2 | 1 | 3 | 3 | 1 | 2 | 2 | 0 | 3  | 2 | 3 | 1 | 1 | 4 |
| Human, 2004, Örebro, Sweden                                  | 519 |                 | 3 | 2  | 12 | 5 | 4 | 4 | 2 | 2 | 2 | 2 | 5 | 2 | 1 | 4 | 3 | 1 | 2 | 2 | 0 | 3  | 2 | 3 | 1 | 1 | 4 |
| Live vaccine strain, Russia                                  | 458 | LVS, ATCC 29684 | 3 | 2  | 16 | 5 | 2 | 4 | 2 | 2 | 2 | 2 | 5 | 2 | 1 | 3 | 3 | 1 | 2 | 2 | 0 | 4  | 2 | 4 | 1 | 2 | 4 |
| Human, 1995, Ljusdal, Sweden                                 | 171 |                 | 3 | 2  | 10 | 5 | 2 | 5 | 2 | 2 | 2 | 2 | 5 | 2 | 1 | 4 | 3 | 1 | 2 | 2 | 0 | 3  | 2 | 4 | 1 | 2 | 4 |
| Human, 2003, Örebro, Sweden                                  | 398 |                 | 3 | 2  | 21 | 5 | 2 | 5 | 2 | 2 | 2 | 2 | 5 | 2 | 1 | 4 | 3 | 1 | 2 | 2 | 0 | 3  | 2 | 4 | 1 | 2 | 4 |
| Human, 2003, Örebro, Sweden                                  | 412 |                 | 3 | 2  | 21 | 5 | 2 | 5 | 2 | 2 | 2 | 2 | 5 | 2 | 1 | 4 | 3 | 1 | 2 | 2 | 0 | 3  | 2 | 4 | 1 | 2 | 4 |
| Human, 2003, Örebro, Sweden                                  | 429 |                 | 3 | 2  | 22 | 5 | 2 | 5 | 2 | 2 | 2 | 2 | 5 | 2 | 1 | 4 | 3 | 1 | 2 | 2 | 0 | 3  | 2 | 4 | 1 | 2 | 4 |
| Tick, 1949, Moscow area, Russia                              | 257 | GIEM 503/840    | 3 | 2  | 17 | 5 | 2 | 4 | 2 | 2 | 2 | 2 | 5 | 2 | 1 | 3 | 3 | 1 | 2 | 2 | 0 | 3  | 4 | 4 | 1 | 2 | 4 |

\*MLVA, multilocus variable-number tandem repeat analysis; FSC, *Francisella* Strain Collection; ATCC, American Type Culture Collection.
